# Supplementary material for: Significant spatial patterns from the GCM seasonal forecasts of global precipitation
Source: Copernicus journal article supplement (doi:10.5194/hess-2019-398), 2019-09-05
Supplement: Supplementary file 1 [file hess-2019-398-supplement.pdf]

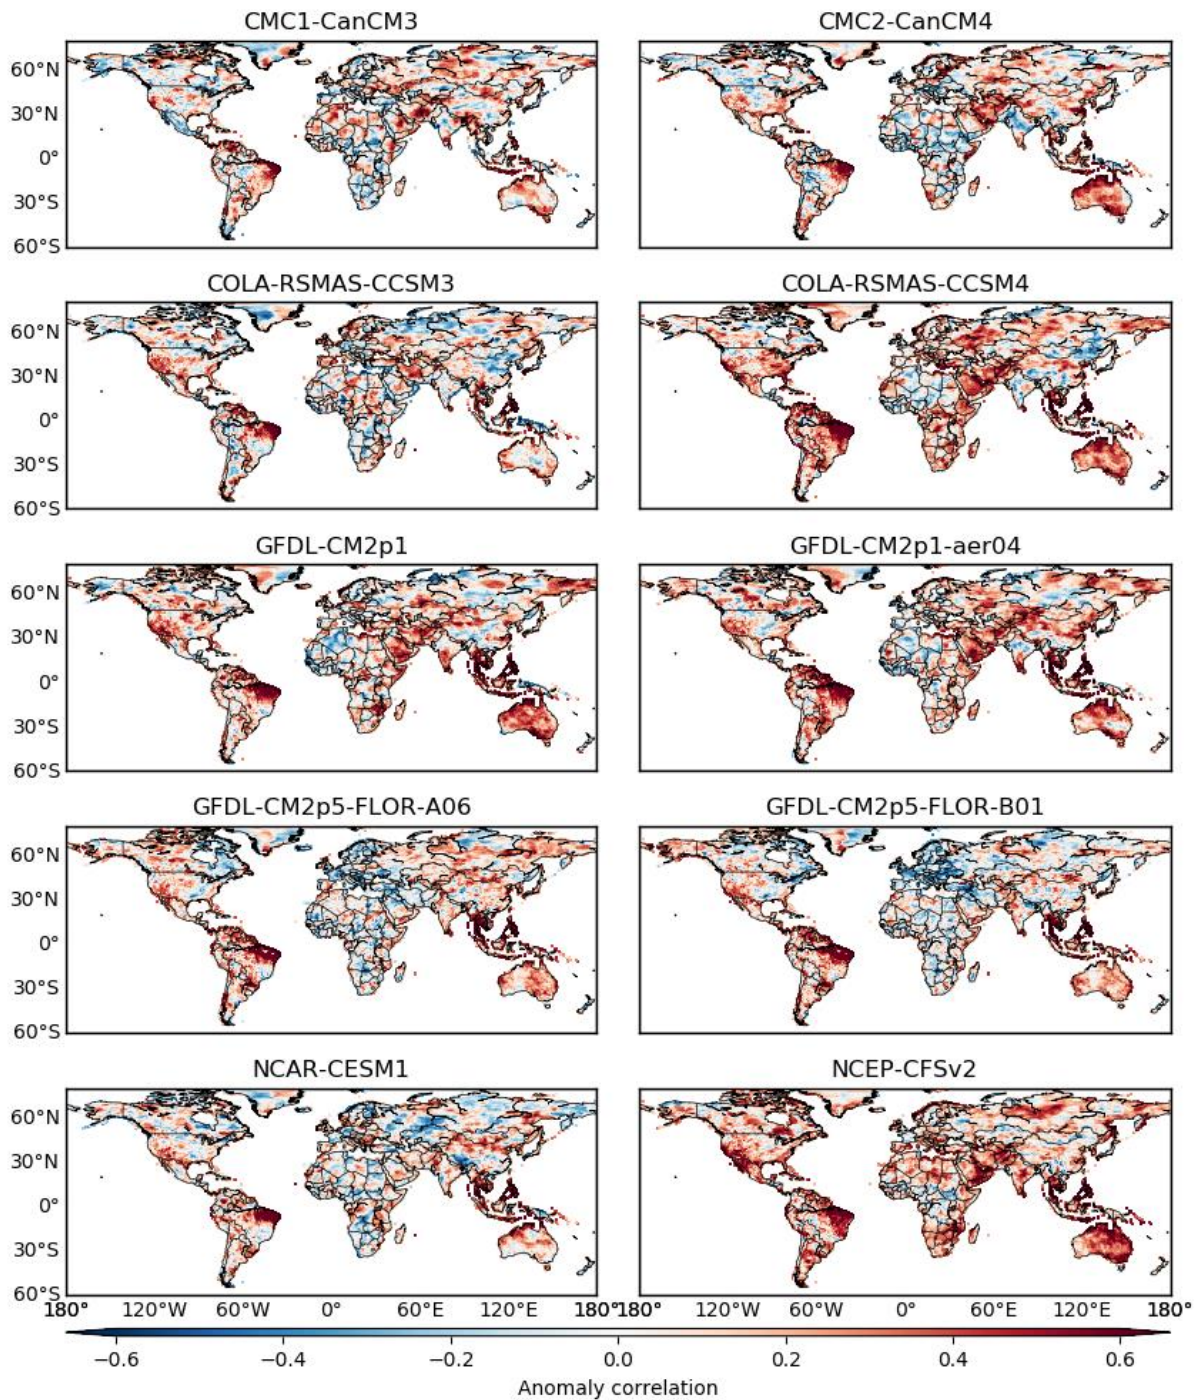

Figure S1: As for Figure 1, but for March, April, and May

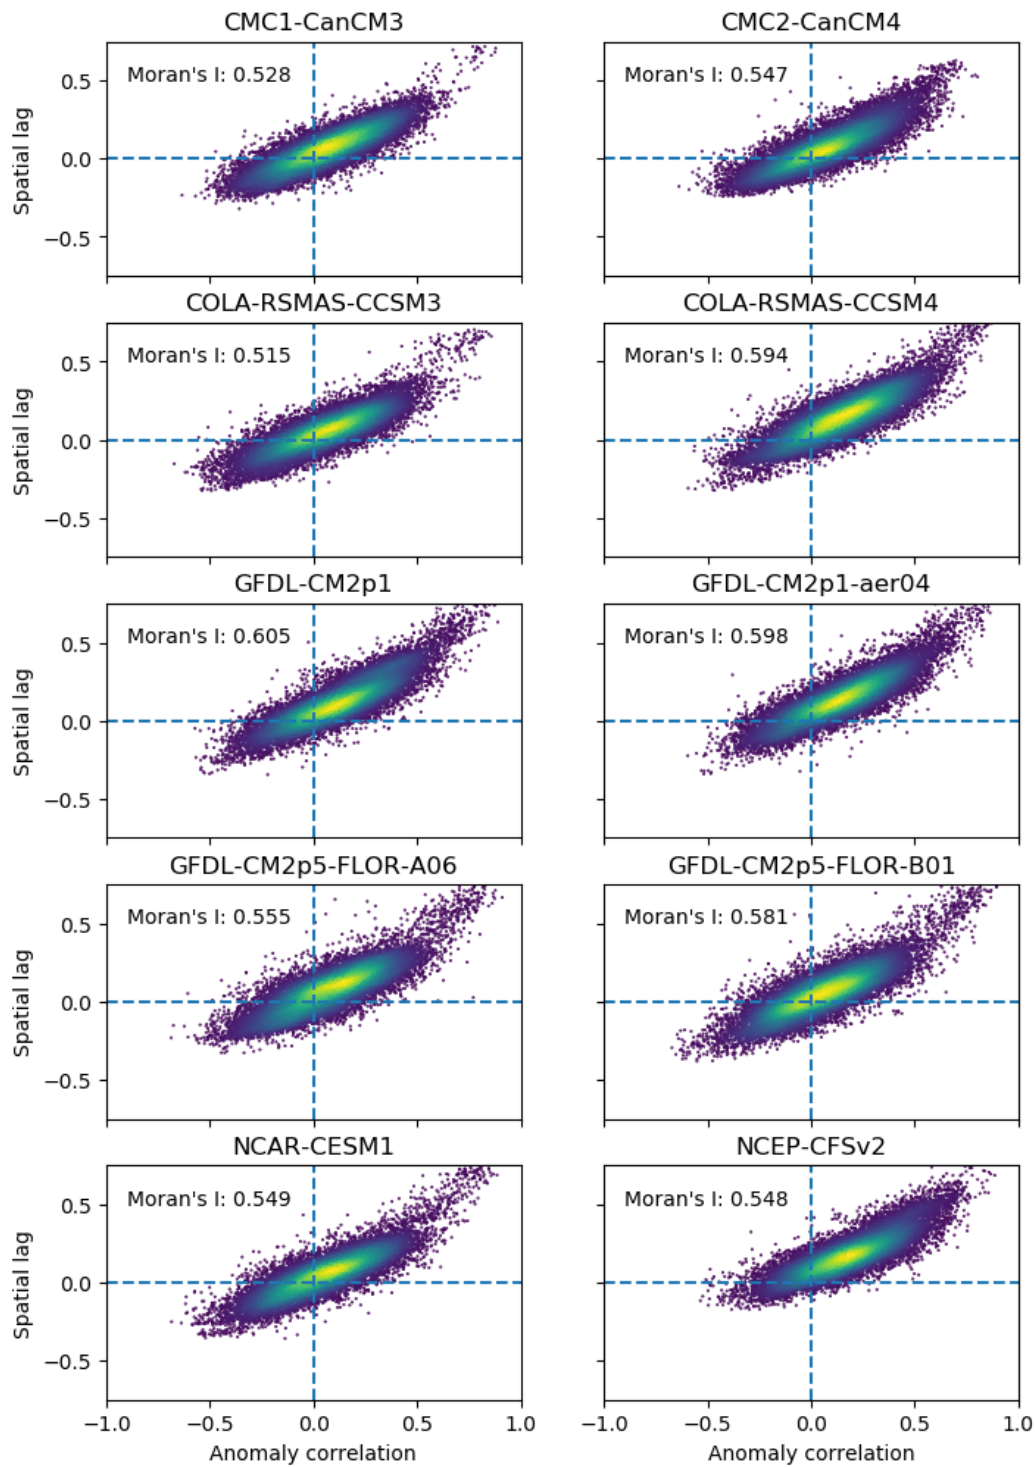

5 Figure S2: As for Figure 2, but for March, April, and May

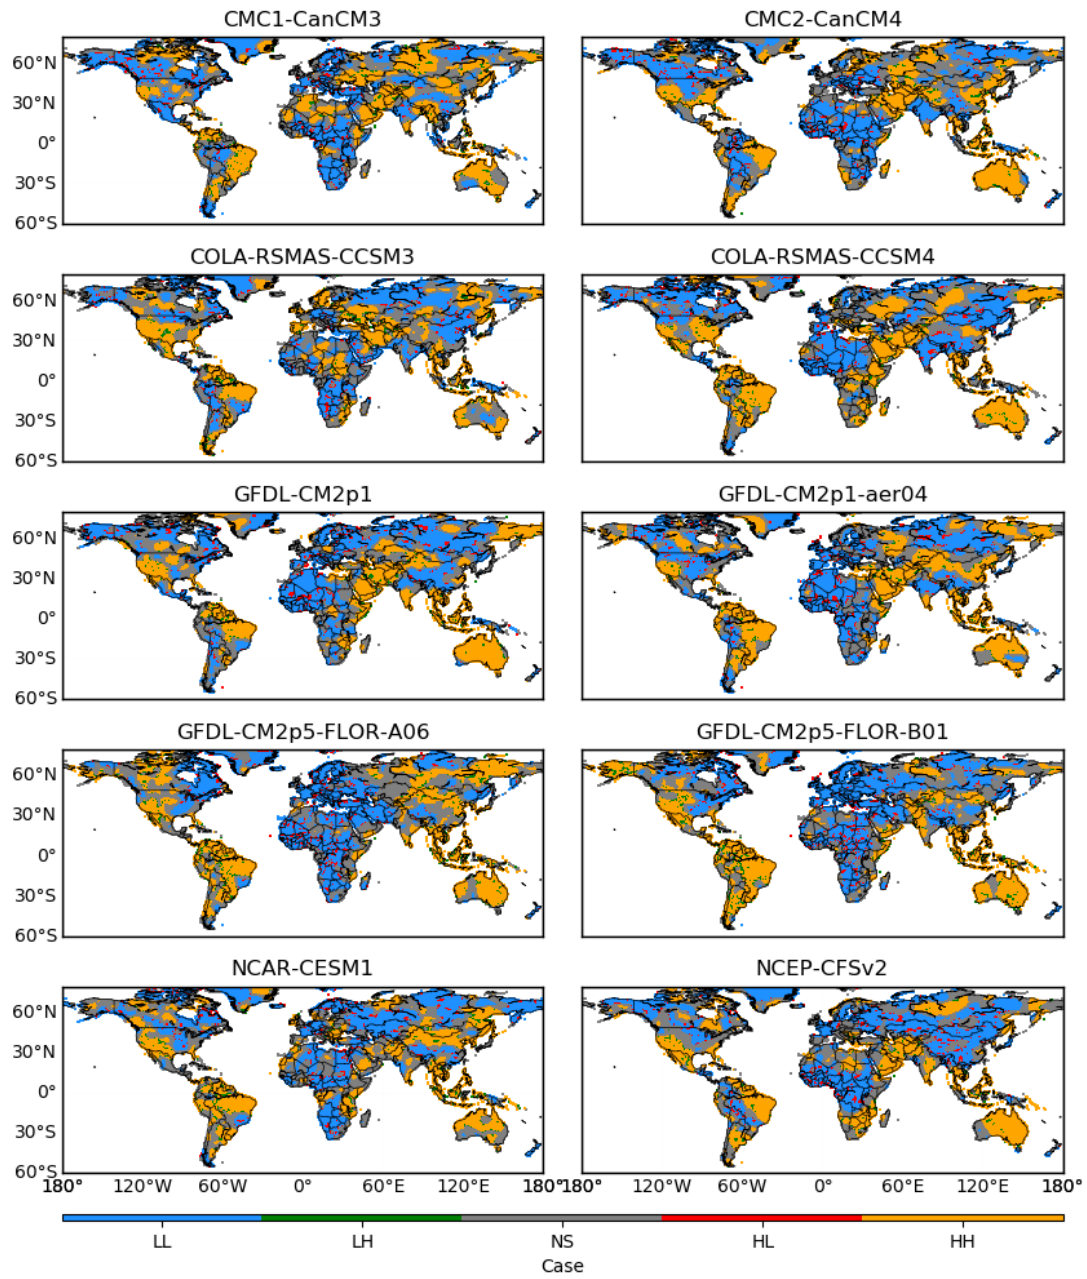

Figure S3: As for Figure 3, but for March, April, and May

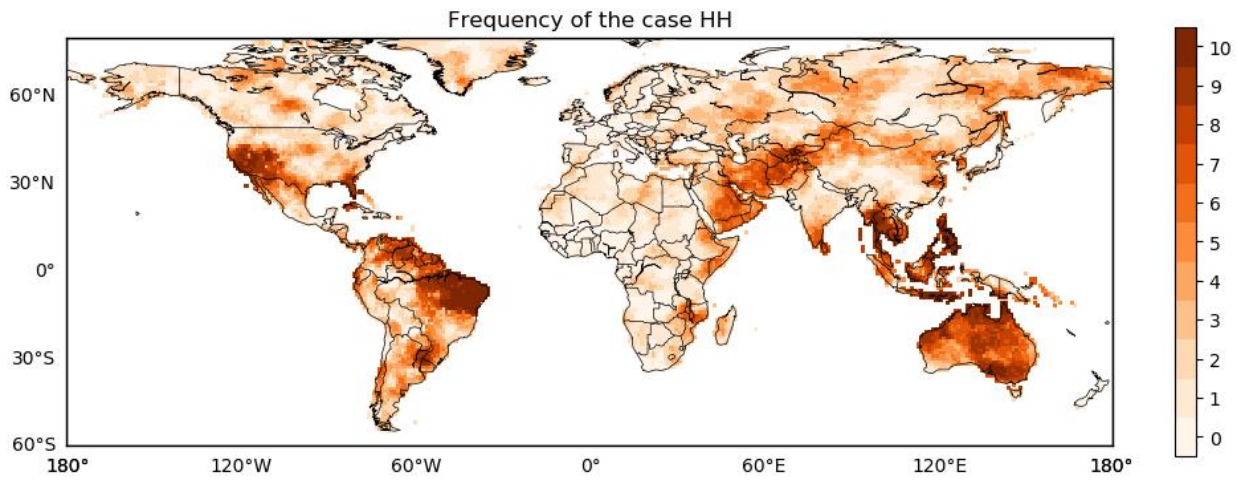

Figure S4: As for Figure 4, but for March, April, and May

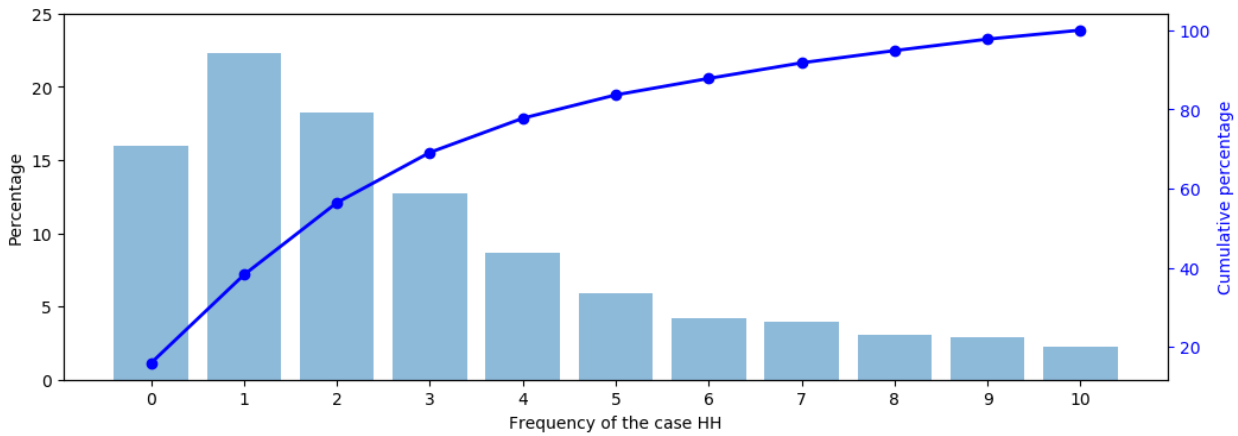

15 Figure S5: As for Figure 5, but for March, April, and May

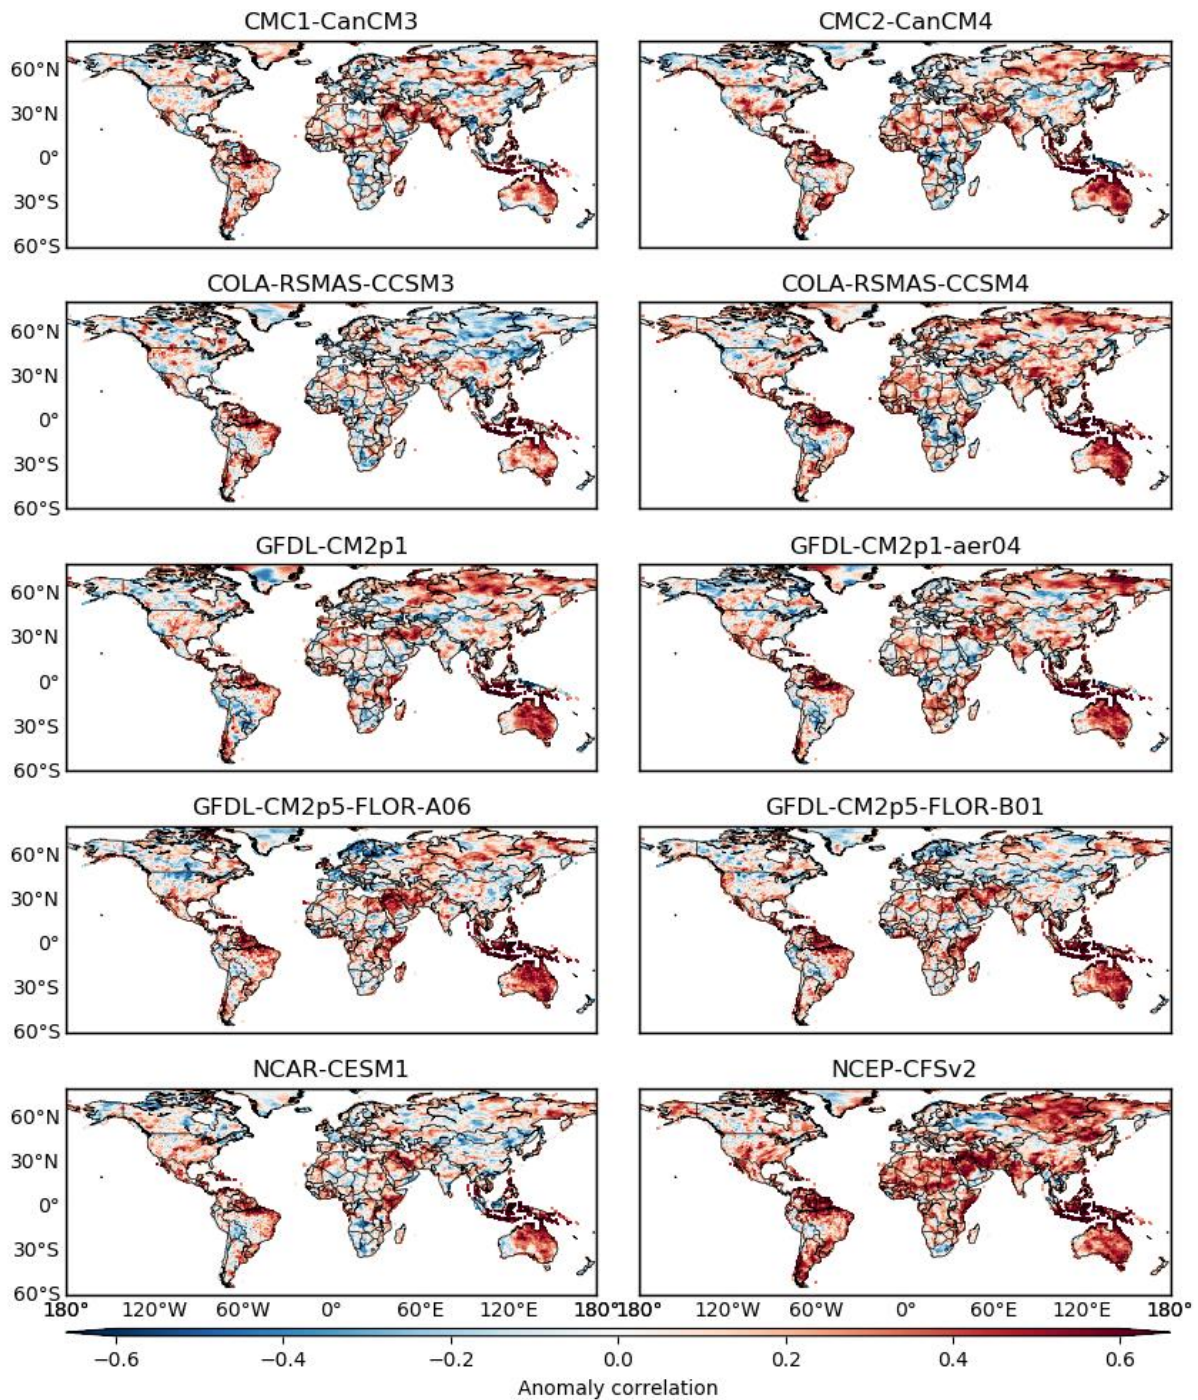

Figure S6: As for Figure 1, but for September, October, and November

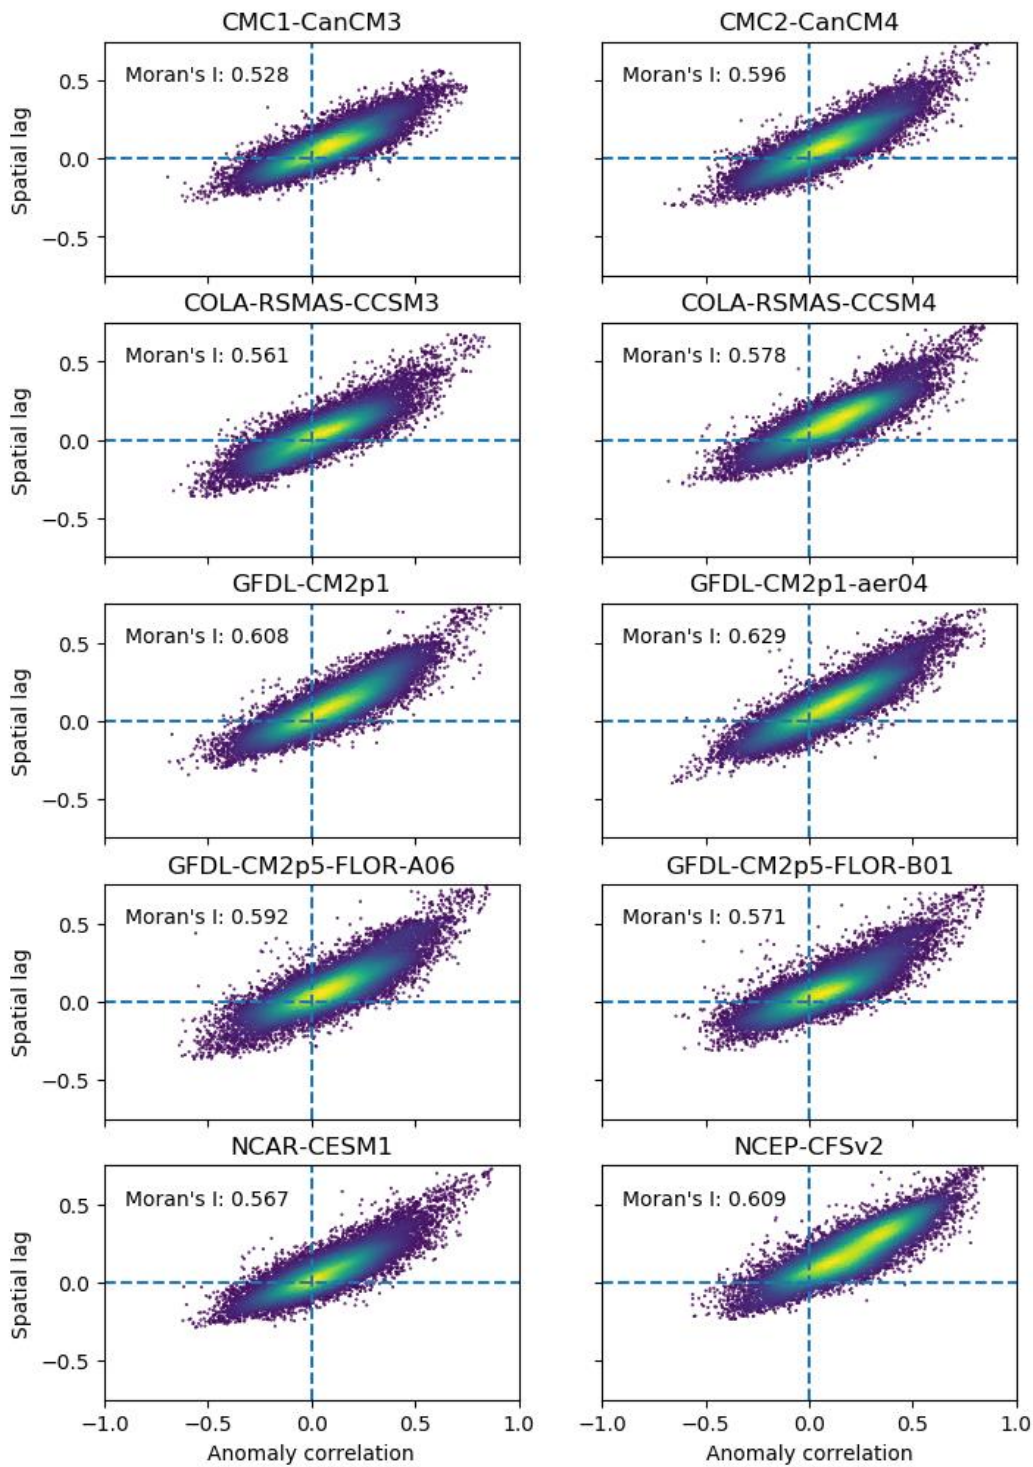

20

Figure S7: As for Figure 2, but for September, October, and November

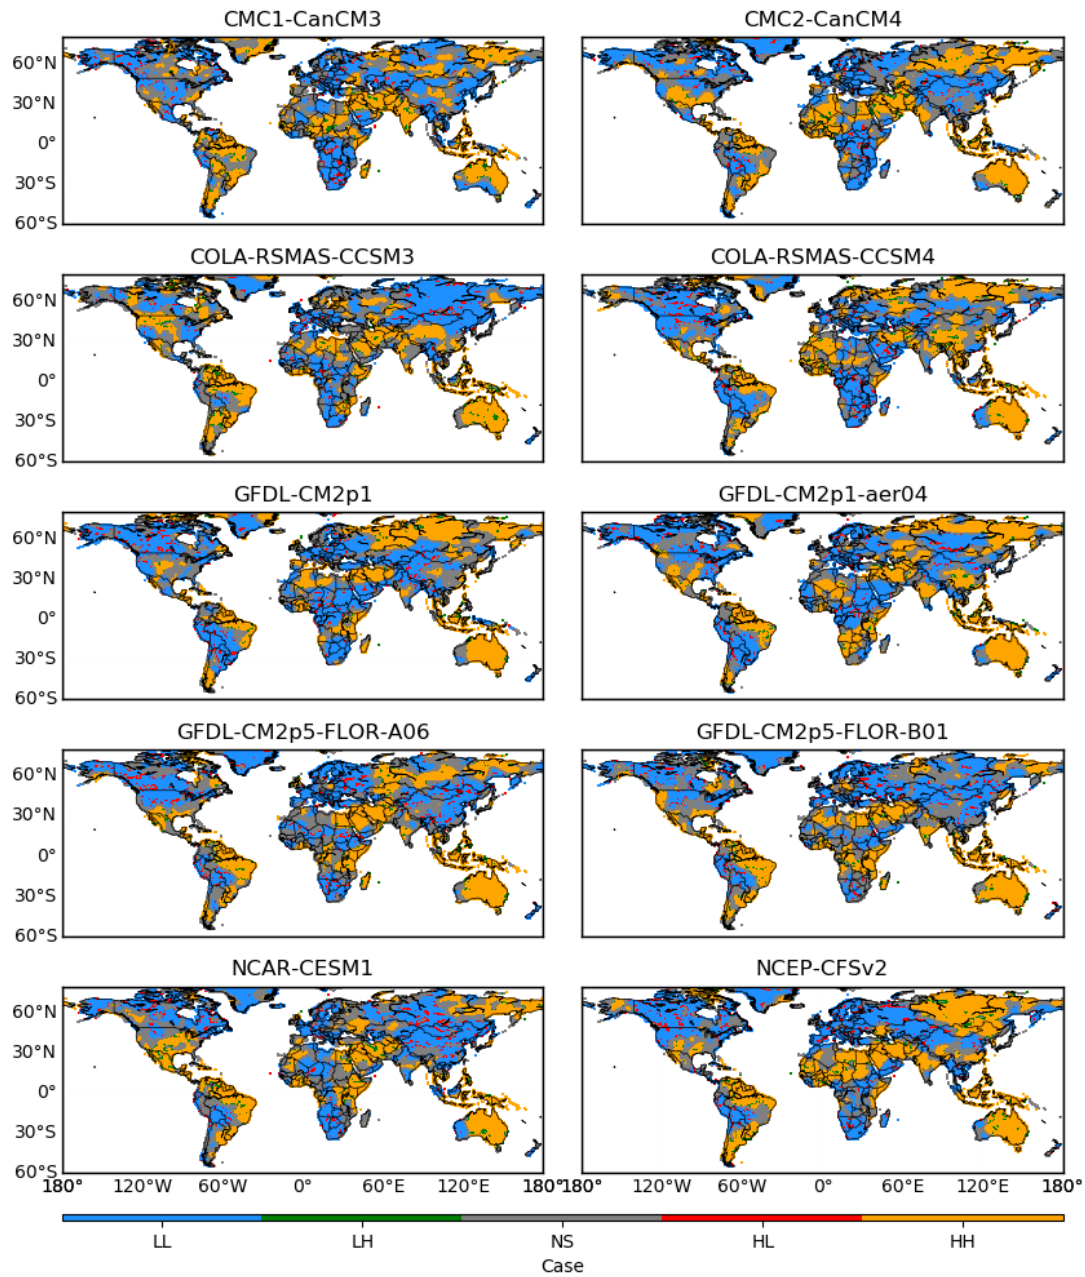

Figure S8: As for Figure 3, but for September, October, and November

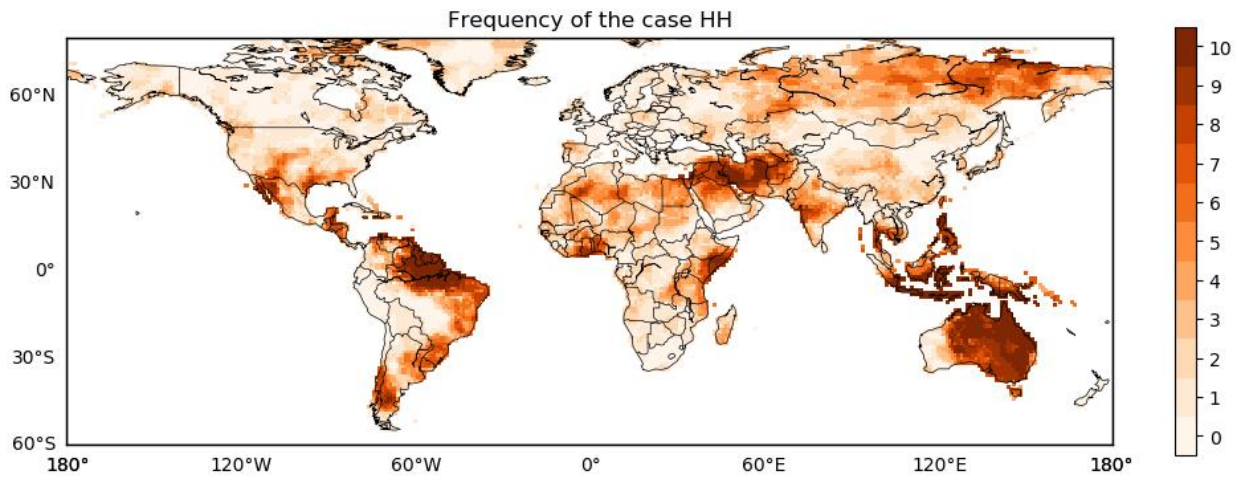

Figure S9: As for Figure 4, but for September, October, and November

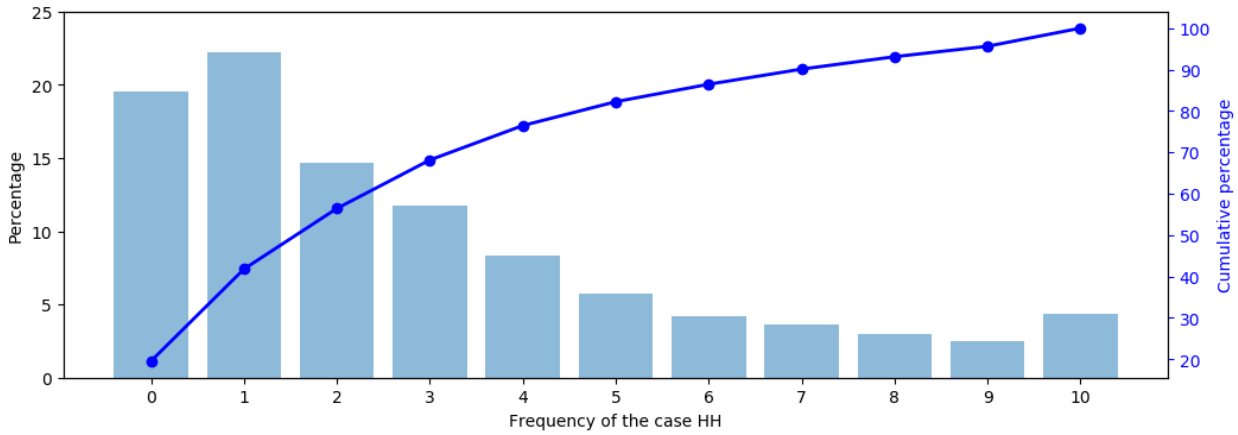

Figure S10: As for Figure 5, but for September, October, and November

30



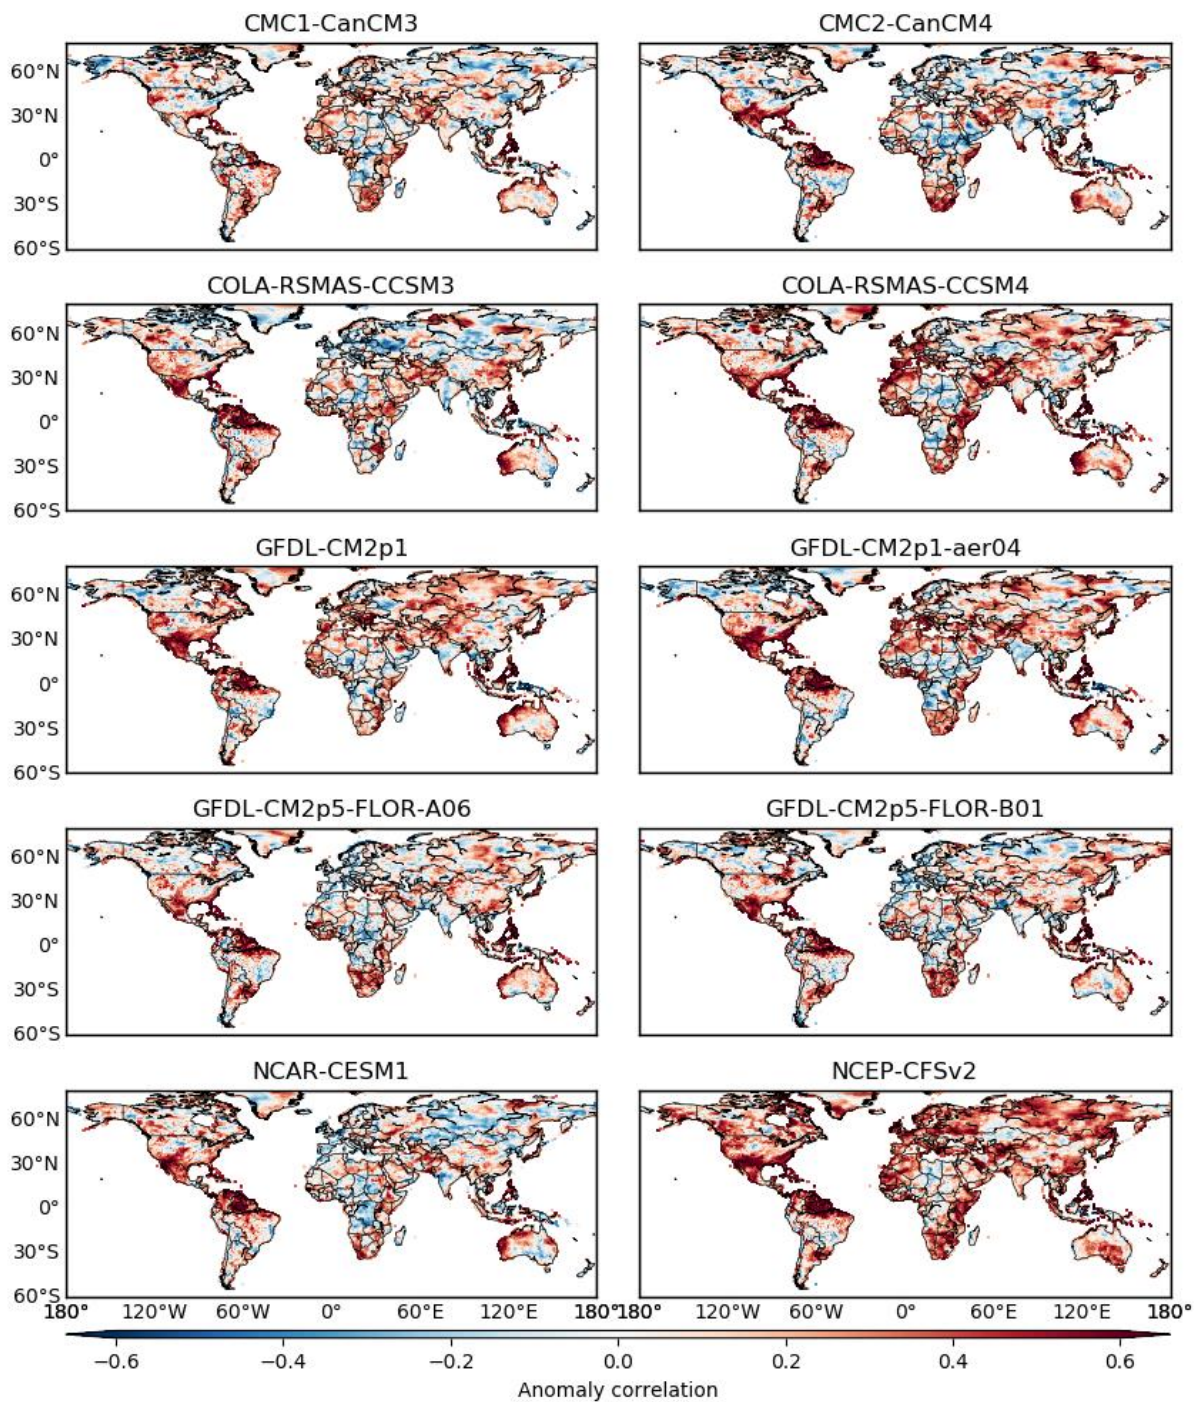

Figure S11: As for Figure 1, but for December, January, and February

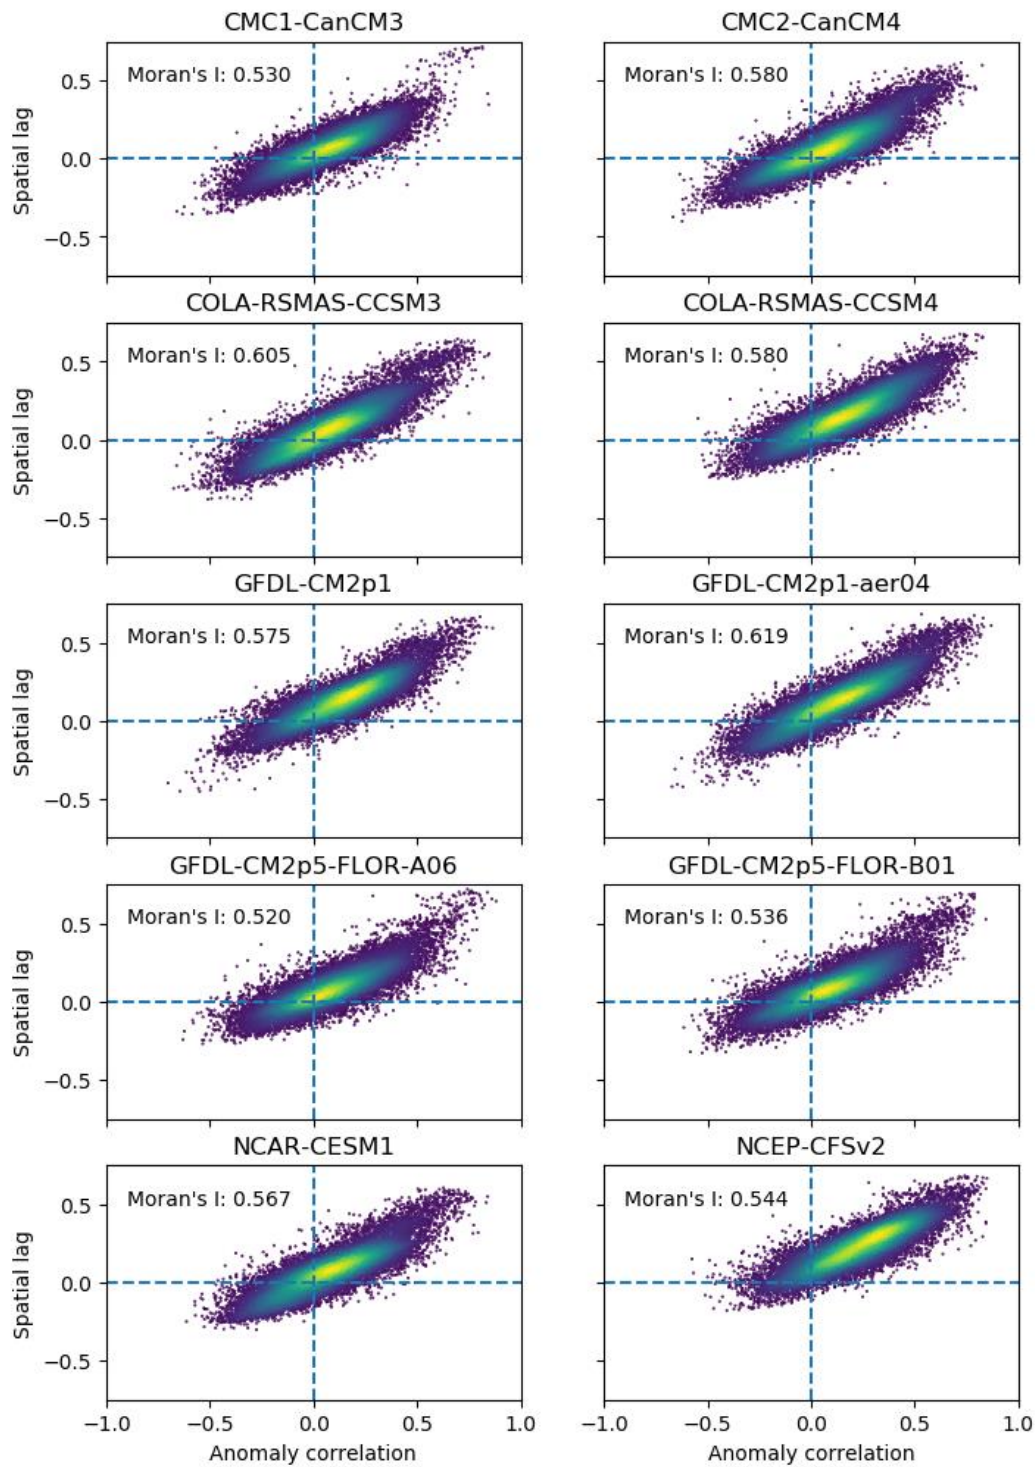

Figure S12: As for Figure 2, but for December, January, and February

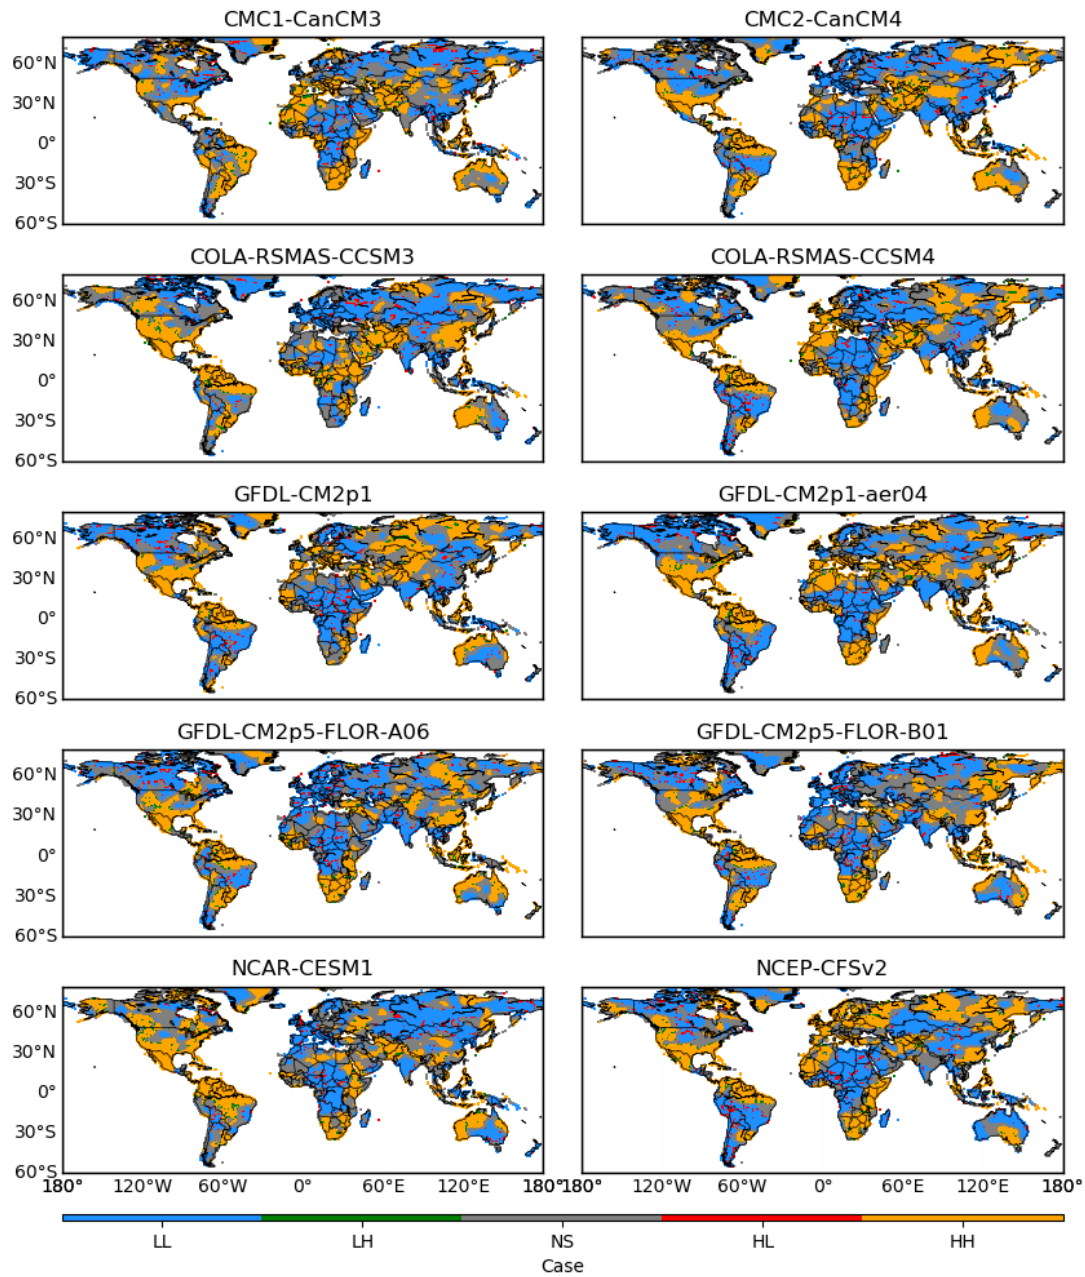

40 Figure S13: As for Figure 3, but for December, January, and February

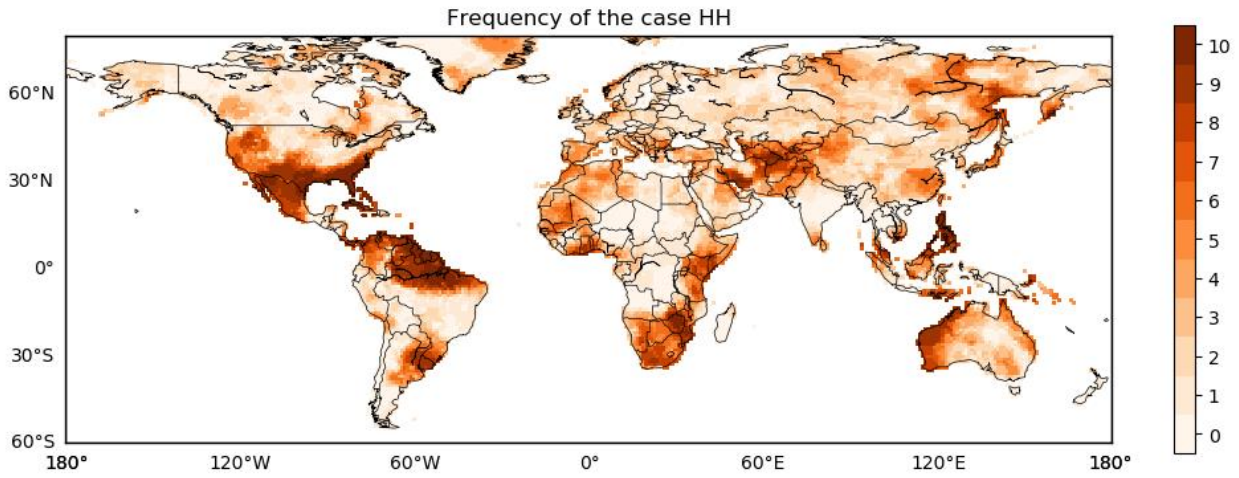

Figure S14: As for Figure 4, but for December, January, and February

45

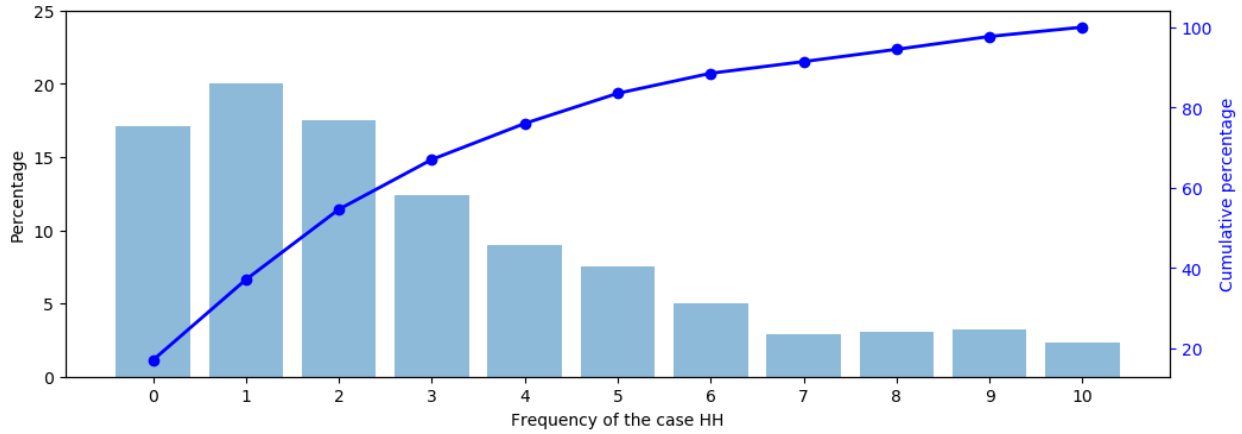

Figure S15: As for Figure 5, but for December, January, and February
